# Supplementary material for: Genomic insights into population history and biological adaptation in Oceania
Source: Springer Nature journal article supplement (doi:10.1038/s41586-021-03236-5), 2021-04-14
Supplement: MOESM4 [file 41586_2021_3236_MOESM4_ESM.xlsx]

## Sheet: Table S01
	Supplementary Table 1. Information on samples used in this study
	Sample ID	Sex	Region	Country	Population	Three letter code	Coverage	Reference	Note
	LP6005443-DNA_F02	M	Africa	Botswana	BantuTswana	AFR	33.4	Mallick et al. 2016	-
	LP6005443-DNA_G02	M	Africa	Botswana	BantuTswana	AFR	36.6	Mallick et al. 2016	-
	LP6005441-DNA_A08	M	Africa	DRC	Mbuti	AFR	33	Mallick et al. 2016	-
	LP6005441-DNA_B08	F	Africa	DRC	Mbuti	AFR	32	Mallick et al. 2016	-
	LP6005592-DNA_C03	M	Africa	DRC	Mbuti	AFR	35	Mallick et al. 2016	-
	SS6004471	M	Africa	DRC	Mbuti	AFR	33.2	Mallick et al. 2016	PCR-based
	LP6005442-DNA_G10	M	Africa	Gambia	Gambian	AFR	34.2	Mallick et al. 2016	-
	LP6005442-DNA_H10	F	Africa	Gambia	Gambian	AFR	32.9	Mallick et al. 2016	-
	LP6005441-DNA_B02	F	Africa	Kenya	BantuKenya	AFR	32.7	Mallick et al. 2016	-
	LP6005443-DNA_A01	M	Africa	Kenya	BantuKenya	AFR	38.2	Mallick et al. 2016	-
	LP6005442-DNA_E11	M	Africa	Kenya	Luhya	AFR	31.3	Mallick et al. 2016	-
	LP6005442-DNA_F11	F	Africa	Kenya	Luhya	AFR	33.1	Mallick et al. 2016	-
	LP6005442-DNA_F09	F	Africa	Kenya	Luo	AFR	32.2	Mallick et al. 2016	-
	LP6005677-DNA_G01	M	Africa	Kenya	Luo	AFR	33.2	Mallick et al. 2016	-
	LP6005441-DNA_A11	M	Africa	Namibia	Ju'hoan North	AFR	31.8	Mallick et al. 2016	-
	LP6005443-DNA_G08	M	Africa	Namibia	Ju'hoan North	AFR	37.4	Mallick et al. 2016	-
	SS6004473	M	Africa	Namibia	Ju'hoan North	AFR	34	Mallick et al. 2016	PCR-based
	LP6005442-DNA_A10	M	Africa	Nigeria	Esan	AFR	31.2	Mallick et al. 2016	-
	LP6005442-DNA_B10	F	Africa	Nigeria	Esan	AFR	34.5	Mallick et al. 2016	-
	LP6005442-DNA_A02	M	Africa	Nigeria	Yoruba	AFR/YRB	30.4	Mallick et al. 2016	-
	LP6005442-DNA_B02	F	Africa	Nigeria	Yoruba	AFR/YRB	31.3	Mallick et al. 2016	-
	SS6004475	M	Africa	Nigeria	Yoruba	AFR/YRB	34.4	Mallick et al. 2016	PCR-based
	LP6005441-DNA_G02	M	Africa	RCA	Biaka	AFR	36.3	Mallick et al. 2016	-
	LP6005441-DNA_H02	M	Africa	RCA	Biaka	AFR	36.3	Mallick et al. 2016	-
	LP6005441-DNA_E07	M	Africa	Senegal	Mandenka	AFR	30.7	Mallick et al. 2016	-
	LP6005441-DNA_F07	F	Africa	Senegal	Mandenka	AFR	33.4	Mallick et al. 2016	-
	SS6004470	M	Africa	Senegal	Mandenka	AFR	33.1	Mallick et al. 2016	PCR-based
	LP6005442-DNA_G11	M	Africa	Sierra Leone	Mende	AFR	34.4	Mallick et al. 2016	-
	LP6005442-DNA_H11	F	Africa	Sierra Leone	Mende	AFR	32.3	Mallick et al. 2016	-
	LP6005443-DNA_E02	M	Africa	South Africa	BantuHerero	AFR	36.9	Mallick et al. 2016	-
	LP6005592-DNA_C05	F	Africa	South Africa	Khomani San	AFR	38.8	Mallick et al. 2016	-
	LP6005677-DNA_D03	F	Africa	South Africa	Khomani San	AFR	37.1	Mallick et al. 2016	-
	LP6005443-DNA_B09	M	Africa	Sudan	Dinka	AFR	32.1	Mallick et al. 2016	-
	LP6005443-DNA_H08	M	Africa	Sudan	Dinka	AFR	34.3	Mallick et al. 2016	-
	SS6004480	M	Africa	Sudan	Dinka	AFR	32.3	Mallick et al. 2016	PCR-based
	LP6005677-DNA_B01	F	West Eurasia	Albania	Albanian	EUR	31.5	Mallick et al. 2016	-
	LP6005442-DNA_A03	M	West Eurasia	Bulgaria	Bulgarian	EUR	35.6	Mallick et al. 2016	-
	LP6005442-DNA_B03	M	West Eurasia	Bulgaria	Bulgarian	EUR	32.8	Mallick et al. 2016	-
	LP6005443-DNA_H05	M	West Eurasia	Czech Republic	Czech	EUR	38	Mallick et al. 2016	-
	LP6005442-DNA_G03	M	West Eurasia	Estonia	Estonian	EUR	31.2	Mallick et al. 2016	-
	LP6005442-DNA_H03	M	West Eurasia	Estonia	Estonian	EUR	33.2	Mallick et al. 2016	-
	LP6005441-DNA_C02	M	West Eurasia	France	Basque	EUR	35.1	Mallick et al. 2016	-
	LP6005441-DNA_D02	F	West Eurasia	France	Basque	EUR	32.9	Mallick et al. 2016	-
	LP6005441-DNA_A05	M	West Eurasia	France	French	EUR	35.9	Mallick et al. 2016	-
	LP6005441-DNA_B05	F	West Eurasia	France	French	EUR	33.1	Mallick et al. 2016	-
	SS6004468	M	West Eurasia	France	French	EUR	35.3	Mallick et al. 2016	PCR-based
	LP6005442-DNA_A08	M	West Eurasia	Hungaria	Hungarian	EUR	34.5	Mallick et al. 2016	-
	LP6005442-DNA_B08	F	West Eurasia	Hungaria	Hungarian	EUR	33.8	Mallick et al. 2016	-
	LP6005442-DNA_D08	F	West Eurasia	Iceland	Icelandic	EUR	32.2	Mallick et al. 2016	-
	LP6005443-DNA_B06	F	West Eurasia	Iceland	Icelandic	EUR	37.5	Mallick et al. 2016	-
	LP6005441-DNA_A06	M	West Eurasia	Italy	Bergamo	EUR	47	Mallick et al. 2016	-
	LP6005441-DNA_B06	F	West Eurasia	Italy	Bergamo	EUR	53.3	Mallick et al. 2016	-
	LP6005441-DNA_C11	M	West Eurasia	Italy	Sardinian	EUR/SAR	31.6	Mallick et al. 2016	-
	LP6005441-DNA_D11	F	West Eurasia	Italy	Sardinian	EUR/SAR	30.2	Mallick et al. 2016	-
	SS6004474	M	West Eurasia	Italy	Sardinian	EUR/SAR	33.6	Mallick et al. 2016	PCR-based
	LP6005441-DNA_G12	M	West Eurasia	Italy	Tuscan	EUR	34.7	Mallick et al. 2016	-
	LP6005441-DNA_H12	F	West Eurasia	Italy	Tuscan	EUR	33.5	Mallick et al. 2016	-
	LP6005592-DNA_B01	U	West Eurasia	Norway	Norwegian	EUR	38.2	Mallick et al. 2016	-
	LP6005592-DNA_E02	M	West Eurasia	Poland	Polish	EUR	37.4	Mallick et al. 2016	-
	LP6005442-DNA_A11	M	West Eurasia	Spain	Spanish	EUR	31.1	Mallick et al. 2016	-
	LP6005442-DNA_B11	F	West Eurasia	Spain	Spanish	EUR	35.2	Mallick et al. 2016	-
	LP6005519-DNA_C03	M	West Eurasia	Tajikistan	Tajik	EUR	38.9	Mallick et al. 2016	-
	LP6005519-DNA_D03	M	West Eurasia	Tajikistan	Tajik	EUR	37	Mallick et al. 2016	-
	LP6005677-DNA_A03	F	West Eurasia	Turkey	Turkish	EUR	35.6	Mallick et al. 2016	-
	LP6005677-DNA_C03	M	West Eurasia	Turkey	Turkish	EUR	36.2	Mallick et al. 2016	-
	LP6005442-DNA_E10	M	West Eurasia	United Kingdom	English	EUR	34.7	Mallick et al. 2016	-
	LP6005442-DNA_F10	F	West Eurasia	United Kingdom	English	EUR	36.3	Mallick et al. 2016	-
	LP6005441-DNA_C09	M	West Eurasia	United Kingdom	Orcadian	EUR	33.8	Mallick et al. 2016	-
	LP6005441-DNA_D09	F	West Eurasia	United Kingdom	Orcadian	EUR	33.5	Mallick et al. 2016	-
	LP6005592-DNA_G01	M	West Eurasia	Yemen	Yemenite Jew	EUR	40.3	Mallick et al. 2016	-
	LP6005592-DNA_H01	F	West Eurasia	Yemen	Yemenite Jew	EUR	38.5	Mallick et al. 2016	-
	LP6005441-DNA_D04	F	East Asia	China	Dai	ASN	33.2	Mallick et al. 2016	-
	LP6005443-DNA_B01	M	East Asia	China	Dai	ASN	33.9	Mallick et al. 2016	-
	LP6005592-DNA_D03	F	East Asia	China	Dai	ASN	37.7	Mallick et al. 2016	-
	SS6004467	M	East Asia	China	Dai	ASN	33.2	Mallick et al. 2016	PCR-based
	LP6005441-DNA_C05	M	East Asia	China	Han	ASN/HAN	34.7	Mallick et al. 2016	-
	LP6005441-DNA_D05	F	East Asia	China	Han	ASN/HAN	46.8	Mallick et al. 2016	-
	LP6005441-DNA_G05	M	East Asia	China	Hezhen	ASN	35	Mallick et al. 2016	-
	LP6005441-DNA_H05	F	East Asia	China	Hezhen	ASN	33.8	Mallick et al. 2016	-
	LP6005441-DNA_B07	F	East Asia	China	Lahu	ASN	32.9	Mallick et al. 2016	-
	LP6005443-DNA_E01	M	East Asia	China	Lahu	ASN	41.8	Mallick et al. 2016	-
	LP6005441-DNA_C08	M	East Asia	China	Miao	ASN	30.2	Mallick et al. 2016	-
	LP6005441-DNA_D08	F	East Asia	China	Miao	ASN	31.4	Mallick et al. 2016	-
	LP6005441-DNA_B09	F	East Asia	China	Naxi	ASN	34.4	Mallick et al. 2016	-
	LP6005443-DNA_E09	M	East Asia	China	Naxi	ASN	35	Mallick et al. 2016	-
	LP6005443-DNA_F01	M	East Asia	China	She	ASN	37.5	Mallick et al. 2016	-
	LP6005443-DNA_G01	F	East Asia	China	She	ASN	37.6	Mallick et al. 2016	-
	LP6005441-DNA_D12	F	East Asia	China	Tu	ASN	32.6	Mallick et al. 2016	-
	LP6005443-DNA_H01	M	East Asia	China	Tu	ASN	38.4	Mallick et al. 2016	-
	LP6005441-DNA_F12	F	East Asia	China	Tujia	ASN	32.9	Mallick et al. 2016	-
	LP6005443-DNA_A02	M	East Asia	China	Tujia	ASN	38.3	Mallick et al. 2016	-
	LP6005442-DNA_D01	M	East Asia	China	Xibo	ASN	31.9	Mallick et al. 2016	-
	LP6005443-DNA_C02	M	East Asia	China	Xibo	ASN	38.9	Mallick et al. 2016	-
	LP6005442-DNA_H01	F	East Asia	China	Yi	ASN	33.8	Mallick et al. 2016	-
	LP6005441-DNA_C06	M	East Asia	Japan	Japanese	ASN	56.2	Mallick et al. 2016	-
	LP6005441-DNA_D06	F	East Asia	Japan	Japanese	ASN	34.9	Mallick et al. 2016	-
	LP6005592-DNA_C02	M	East Asia	Japan	Japanese	ASN	38	Mallick et al. 2016	-
	LP6005443-DNA_C06	F	East Asia	Korea	Korean	ASN	38.8	Mallick et al. 2016	-
	LP6005443-DNA_D06	M	East Asia	Korea	Korean	ASN	35.7	Mallick et al. 2016	-
	LP6005519-DNA_A06	M	East Asia	Myanmar	Burmese	ASN	38	Mallick et al. 2016	-
	LP6005519-DNA_B06	M	East Asia	Myanmar	Burmese	ASN	40.7	Mallick et al. 2016	-
	LP6005442-DNA_C07	M	East Asia	Taiwan	Ami	ASN/TWN	31.6	Mallick et al. 2016	-
	LP6005443-DNA_G05	M	East Asia	Taiwan	Ami	ASN/TWN	36.9	Mallick et al. 2016	-
	B00FLGA	F	East Asia	Taiwan	Atayal	ASN/TWN	33.6	This study	-
	B00FLGE	M	East Asia	Taiwan	Atayal	ASN/TWN	35.5	This study	-
	B00FLGI	M	East Asia	Taiwan	Atayal	ASN/TWN	36.2	This study	-
	B00FLGM	F	East Asia	Taiwan	Atayal	ASN/TWN	34.4	This study	-
	B00FLGQ	F	East Asia	Taiwan	Atayal	ASN/TWN	37.2	This study	-
	B00FLGU	M	East Asia	Taiwan	Atayal	ASN/TWN	36.3	This study	-
	B00FLGY	F	East Asia	Taiwan	Atayal	ASN/TWN	36.8	This study	-
	B00FLH2	M	East Asia	Taiwan	Atayal	ASN/TWN	37.7	This study	-
	B00FLH6	M	East Asia	Taiwan	Atayal	ASN/TWN	36.9	This study	-
	B00FLHA	F	East Asia	Taiwan	Atayal	ASN/TWN	37.1	This study	-
	LP6005442-DNA_E07	M	East Asia	Taiwan	Atayal	ASN/TWN	31.9	Mallick et al. 2016	-
	B00FLHE*	M	East Asia	Taiwan	Paiwan	ASN/TWN	34.8	This study	Related
	B00FLHI	F	East Asia	Taiwan	Paiwan	ASN/TWN	34.4	This study	PCR-based
	B00FLHM	M	East Asia	Taiwan	Paiwan	ASN/TWN	36.4	This study	-
	B00FLHQ*	F	East Asia	Taiwan	Paiwan	ASN/TWN	36.1	This study	Related
	B00FLHU	M	East Asia	Taiwan	Paiwan	ASN/TWN	36	This study	-
	B00FLHY	F	East Asia	Taiwan	Paiwan	ASN/TWN	35.1	This study	PCR-based
	B00FLI2	F	East Asia	Taiwan	Paiwan	ASN/TWN	33	This study	-
	B00FLIA	F	East Asia	Taiwan	Paiwan	ASN/TWN	28.9	This study	-
	B00FLIE	F	East Asia	Taiwan	Paiwan	ASN/TWN	34.3	This study	PCR-based
	LP6005443-DNA_A07	M	East Asia	Thailand	Thai	ASN	38.9	Mallick et al. 2016	-
	LP6005443-DNA_B07	F	East Asia	Thailand	Thai	ASN	36.2	Mallick et al. 2016	-
	LP6005442-DNA_C11	M	East Asia	Vietnam	Kinh	ASN	32.4	Mallick et al. 2016	-
	LP6005442-DNA_D11	F	East Asia	Vietnam	Kinh	ASN	32.8	Mallick et al. 2016	-
	LP6005519-DNA_E06	F	Southeast Asia	Brunei	Dusun	MLY	33.3	Mallick et al. 2016	-
	LP6005519-DNA_F06	F	Southeast Asia	Brunei	Dusun	MLY	37.8	Mallick et al. 2016	-
	B00FLGB	M	Southeast Asia	Philippines	Agta	PHP/AGT	34.1	This study	-
	B00FLGF	F	Southeast Asia	Philippines	Agta	PHP/AGT	35.5	This study	-
	B00FLGJ	M	Southeast Asia	Philippines	Agta	PHP/AGT	34.5	This study	-
	B00FLGN	F	Southeast Asia	Philippines	Agta	PHP/AGT	36.6	This study	-
	B00FLGR	M	Southeast Asia	Philippines	Agta	PHP/AGT	37.4	This study	-
	B00FLGV	M	Southeast Asia	Philippines	Agta	PHP/AGT	37.9	This study	-
	B00FLGZ	F	Southeast Asia	Philippines	Agta	PHP/AGT	34.4	This study	-
	B00FLH3	F	Southeast Asia	Philippines	Agta	PHP/AGT	34.5	This study	-
	B00FLH7	M	Southeast Asia	Philippines	Agta	PHP/AGT	32	This study	-
	B00FLHB	F	Southeast Asia	Philippines	Agta	PHP/AGT	34.3	This study	-
	B00FLHF	F	Southeast Asia	Philippines	Agta	PHP/AGT	33.2	This study	-
	B00FLHJ	M	Southeast Asia	Philippines	Agta	PHP/AGT	30.8	This study	-
	B00FLHN	F	Southeast Asia	Philippines	Agta	PHP/AGT	32.4	This study	-
	B00FLHR	F	Southeast Asia	Philippines	Agta	PHP/AGT	34	This study	-
	B00FLHV	F	Southeast Asia	Philippines	Agta	PHP/AGT	31.8	This study	-
	B00FLHZ	M	Southeast Asia	Philippines	Agta	PHP/AGT	32.7	This study	-
	B00FLI3	F	Southeast Asia	Philippines	Agta	PHP/AGT	34.4	This study	-
	B00FLI7	M	Southeast Asia	Philippines	Agta	PHP/AGT	32.5	This study	-
	B00FLIB*	M	Southeast Asia	Philippines	Agta	PHP/AGT	32.7	This study	Related
	B00FLIF*	M	Southeast Asia	Philippines	Agta	PHP/AGT	32.2	This study	Related
	B00FLGC	F	Southeast Asia	Philippines	Cebuano	PHP	34.2	This study	-
	B00FLGG	M	Southeast Asia	Philippines	Cebuano	PHP	36.8	This study	-
	B00FLGK	F	Southeast Asia	Philippines	Cebuano	PHP	33.6	This study	-
	B00FLGO	F	Southeast Asia	Philippines	Cebuano	PHP	34.2	This study	-
	B00FLGS	F	Southeast Asia	Philippines	Cebuano	PHP	34.8	This study	-
	B00FLGW	M	Southeast Asia	Philippines	Cebuano	PHP	37	This study	-
	B00FLH0	M	Southeast Asia	Philippines	Cebuano	PHP	36.2	This study	-
	B00FLH4	M	Southeast Asia	Philippines	Cebuano	PHP	35.5	This study	-
	B00FLH8	F	Southeast Asia	Philippines	Cebuano	PHP	32.4	This study	-
	B00FLHC	M	Southeast Asia	Philippines	Cebuano	PHP	34.1	This study	-
	B00FLHG	M	Southeast Asia	Philippines	Cebuano	PHP	31.6	This study	-
	B00FLHK	M	Southeast Asia	Philippines	Cebuano	PHP	29.1	This study	-
	B00FLHO	M	Southeast Asia	Philippines	Cebuano	PHP	32.2	This study	-
	B00FLHS	M	Southeast Asia	Philippines	Cebuano	PHP	34.9	This study	-
	B00FLHW	M	Southeast Asia	Philippines	Cebuano	PHP	30.7	This study	-
	B00FLI0	M	Southeast Asia	Philippines	Cebuano	PHP	32	This study	-
	B00FLI4	M	Southeast Asia	Philippines	Cebuano	PHP	32.4	This study	-
	B00FLI8	M	Southeast Asia	Philippines	Cebuano	PHP	33.6	This study	-
	B00FLIC	M	Southeast Asia	Philippines	Cebuano	PHP	31.7	This study	-
	B00FLIG	F	Southeast Asia	Philippines	Cebuano	PHP	35.7	This study	-
	LP6005519-DNA_C06	F	Southeast Asia	Philippines	Igorot	PHP	32.8	Mallick et al. 2016	-
	LP6005519-DNA_D06	M	Southeast Asia	Philippines	Igorot	PHP	36.2	Mallick et al. 2016	-
	SS6004477	M	Oceania	Australia	Australian	AUS	35.3	Mallick et al. 2016	PCR-based
	SS6004478	U	Oceania	Australia	Australian	AUS	35.4	Mallick et al. 2016	PCR-based
	LP6005441-DNA_A03	F	Oceania	Papua New Guinea	Bougainville	BGI	33.1	Mallick et al. 2016	-
	LP6005441-DNA_B03	F	Oceania	Papua New Guinea	Bougainville	BGI	34.4	Mallick et al. 2016	-
	EGAN00001279031	M	Oceania	Papua New Guinea	Bundi	PNG	36.8	Malaspinas et al. 2016	-
	EGAN00001279032	M	Oceania	Papua New Guinea	Bundi	PNG	39.7	Malaspinas et al. 2016	-
	EGAN00001279033	M	Oceania	Papua New Guinea	Bundi	PNG	41.6	Malaspinas et al. 2016	-
	EGAN00001279034	M	Oceania	Papua New Guinea	Bundi	PNG	36	Malaspinas et al. 2016	-
	EGAN00001279035	M	Oceania	Papua New Guinea	Bundi	PNG	41.8	Malaspinas et al. 2016	-
	EGAN00001279036	M	Oceania	Papua New Guinea	Kundiawa	PNG	35.8	Malaspinas et al. 2016	-
	EGAN00001279037	M	Oceania	Papua New Guinea	Kundiawa	PNG	36	Malaspinas et al. 2016	-
	EGAN00001279038	M	Oceania	Papua New Guinea	Kundiawa	PNG	34.1	Malaspinas et al. 2016	-
	EGAN00001279039	M	Oceania	Papua New Guinea	Kundiawa	PNG	37.4	Malaspinas et al. 2016	-
	EGAN00001279040	M	Oceania	Papua New Guinea	Kundiawa	PNG	40	Malaspinas et al. 2016	-
	EGAN00001279051	M	Oceania	Papua New Guinea	Marawaka	PNG	38.9	Malaspinas et al. 2016	-
	EGAN00001279052	M	Oceania	Papua New Guinea	Marawaka	PNG	36.8	Malaspinas et al. 2016	-
	EGAN00001279053	M	Oceania	Papua New Guinea	Marawaka	PNG	35.1	Malaspinas et al. 2016	-
	EGAN00001279054	M	Oceania	Papua New Guinea	Marawaka	PNG	36.6	Malaspinas et al. 2016	-
	EGAN00001279055	M	Oceania	Papua New Guinea	Marawaka	PNG	36.1	Malaspinas et al. 2016	-
	EGAN00001279041	M	Oceania	Papua New Guinea	Mendi	PNG	35	Malaspinas et al. 2016	-
	EGAN00001279042	M	Oceania	Papua New Guinea	Mendi	PNG	34.7	Malaspinas et al. 2016	-
	EGAN00001279043	M	Oceania	Papua New Guinea	Mendi	PNG	41	Malaspinas et al. 2016	-
	EGAN00001279044	M	Oceania	Papua New Guinea	Mendi	PNG	37	Malaspinas et al. 2016	-
	EGAN00001279045	M	Oceania	Papua New Guinea	Mendi	PNG	38.4	Malaspinas et al. 2016	-
	LP6005441-DNA_A10	M	Oceania	Papua New Guinea	Papuan	PNG	29.5	Mallick et al. 2016	-
	LP6005441-DNA_B10	F	Oceania	Papua New Guinea	Papuan	PNG	36.1	Mallick et al. 2016	-
	LP6005443-DNA_A08	M	Oceania	Papua New Guinea	Papuan	PNG	36.6	Mallick et al. 2016	-
	LP6005443-DNA_B08	M	Oceania	Papua New Guinea	Papuan	PNG	34.9	Mallick et al. 2016	-
	LP6005443-DNA_C07	M	Oceania	Papua New Guinea	Papuan	PNG	34.5	Mallick et al. 2016	-
	LP6005443-DNA_C08	M	Oceania	Papua New Guinea	Papuan	PNG	35.9	Mallick et al. 2016	-
	LP6005443-DNA_D07	M	Oceania	Papua New Guinea	Papuan	PNG	38.3	Mallick et al. 2016	-
	LP6005443-DNA_D08	F	Oceania	Papua New Guinea	Papuan	PNG	35.4	Mallick et al. 2016	-
	LP6005443-DNA_E07	M	Oceania	Papua New Guinea	Papuan	PNG	37.9	Mallick et al. 2016	-
	LP6005443-DNA_E08	F	Oceania	Papua New Guinea	Papuan	PNG	30.5	Mallick et al. 2016	-
	LP6005443-DNA_F07	M	Oceania	Papua New Guinea	Papuan	PNG	38.2	Mallick et al. 2016	-
	LP6005443-DNA_F08	M	Oceania	Papua New Guinea	Papuan	PNG	35.8	Mallick et al. 2016	-
	LP6005443-DNA_G07	M	Oceania	Papua New Guinea	Papuan	PNG	36.2	Mallick et al. 2016	-
	LP6005443-DNA_H07	M	Oceania	Papua New Guinea	Papuan	PNG	37.2	Mallick et al. 2016	-
	SS6004472	M	Oceania	Papua New Guinea	Papuan	PNG	35.7	Mallick et al. 2016	PCR-based
	EGAN00001279046	M	Oceania	Papua New Guinea	Tari	PNG	36.5	Malaspinas et al. 2016	-
	EGAN00001279047	M	Oceania	Papua New Guinea	Tari	PNG	40.4	Malaspinas et al. 2016	-
	EGAN00001279048	M	Oceania	Papua New Guinea	Tari	PNG	38.1	Malaspinas et al. 2016	-
	EGAN00001279049	M	Oceania	Papua New Guinea	Tari	PNG	38.2	Malaspinas et al. 2016	-
	EGAN00001279050	M	Oceania	Papua New Guinea	Tari	PNG	37.7	Malaspinas et al. 2016	-
	UV1134	M	Oceania	Bismarck Archipelago	Ata	BKA	37.3	Vernot et al. 2016	PCR-based
	UV1230	M	Oceania	Bismarck Archipelago	Ata	BKA	52.4	Vernot et al. 2016	PCR-based
	UV043	M	Oceania	Bismarck Archipelago	Baining	BKA	33	Vernot et al. 2016	PCR-based
	UV305	M	Oceania	Bismarck Archipelago	Baining	BKA	33.1	Vernot et al. 2016	PCR-based
	UV500	M	Oceania	Bismarck Archipelago	Lavongai	BKA	31.2	Vernot et al. 2016	PCR-based
	UV1042	M	Oceania	Bismarck Archipelago	Mamusi	BKA	31.1	Vernot et al. 2016	PCR-based
	UV1224	M	Oceania	Bismarck Archipelago	Mamusi	BKA	32.5	Vernot et al. 2016	PCR-based
	UV1196	M	Oceania	Bismarck Archipelago	Melamala	BKA	36.7	Vernot et al. 2016	PCR-based
	UV518	M	Oceania	Bismarck Archipelago	Mussau	BKA	31.9	Vernot et al. 2016	PCR-based
	UV573	M	Oceania	Bismarck Archipelago	Nailik	BKA	35.5	Vernot et al. 2016	PCR-based
	UV580*	M	Oceania	Bismarck Archipelago	Nailik	BKA	36.4	Vernot et al. 2016	PCR-based; Related
	UV886	M	Oceania	Bismarck Archipelago	Nakanai_Bileki	BKA	35.9	Vernot et al. 2016	PCR-based
	UV897	M	Oceania	Bismarck Archipelago	Nakanai_Bileki	BKA	36.4	Vernot et al. 2016	PCR-based
	UV910	M	Oceania	Bismarck Archipelago	Nakanai_Bileki	BKA	35.3	Vernot et al. 2016	PCR-based
	UV919	M	Oceania	Bismarck Archipelago	Nakanai_Bileki	BKA	36.1	Vernot et al. 2016	PCR-based
	UV923	M	Oceania	Bismarck Archipelago	Nakanai_Bileki	BKA	35.5	Vernot et al. 2016	PCR-based
	UV925	M	Oceania	Bismarck Archipelago	Nakanai_Bileki	BKA	34.2	Vernot et al. 2016	PCR-based
	UV927*	M	Oceania	Bismarck Archipelago	Nakanai_Bileki	BKA	35.6	Vernot et al. 2016	PCR-based; Related
	UV929	M	Oceania	Bismarck Archipelago	Nakanai_Bileki	BKA	34.9	Vernot et al. 2016	PCR-based
	UV931	M	Oceania	Bismarck Archipelago	Nakanai_Bileki	BKA	34.8	Vernot et al. 2016	PCR-based
	UV940	M	Oceania	Bismarck Archipelago	Nakanai_Bileki	BKA	35.4	Vernot et al. 2016	PCR-based
	UV944	M	Oceania	Bismarck Archipelago	Nakanai_Bileki	BKA	33.8	Vernot et al. 2016	PCR-based
	UV946	M	Oceania	Bismarck Archipelago	Nakanai_Bileki	BKA	33.6	Vernot et al. 2016	PCR-based
	UV952*	M	Oceania	Bismarck Archipelago	Nakanai_Bileki	BKA	31.2	Vernot et al. 2016	PCR-based; Related
	UV956*	M	Oceania	Bismarck Archipelago	Nakanai_Bileki	BKA	31.8	Vernot et al. 2016	PCR-based; Related
	UV958	M	Oceania	Bismarck Archipelago	Nakanai_Bileki	BKA	32.2	Vernot et al. 2016	PCR-based
	UV964	M	Oceania	Bismarck Archipelago	Nakanai_Bileki	BKA	33.1	Vernot et al. 2016	PCR-based
	UV971	M	Oceania	Bismarck Archipelago	Nakanai_Bileki	BKA	33.5	Vernot et al. 2016	PCR-based
	UV979*	M	Oceania	Bismarck Archipelago	Nakanai_Bileki	BKA	34.4	Vernot et al. 2016	PCR-based; Related
	UV986	M	Oceania	Bismarck Archipelago	Nakanai_Bileki	BKA	34.2	Vernot et al. 2016	PCR-based
	UV1263	M	Oceania	Bismarck Archipelago	Pasismanua	BKA	32.8	Vernot et al. 2016	PCR-based
	UV1266*	M	Oceania	Bismarck Archipelago	Pasismanua	BKA	31.9	Vernot et al. 2016	PCR-based; Related
	B00I2B2	M	Oceania	Solomon Islands	Malaita	SLI	37.2	This study	-
	B00I2B3	M	Oceania	Solomon Islands	Malaita	SLI	37.3	This study	-
	B00I2B4	M	Oceania	Solomon Islands	Malaita	SLI	33.6	This study	-
	B00I2B5	M	Oceania	Solomon Islands	Malaita	SLI	36.6	This study	-
	B00I2B6	M	Oceania	Solomon Islands	Malaita	SLI	36.3	This study	-
	B00I2B7	M	Oceania	Solomon Islands	Malaita	SLI	35.2	This study	-
	B00I2B8	M	Oceania	Solomon Islands	Malaita	SLI	37.4	This study	-
	B00I2B9	M	Oceania	Solomon Islands	Malaita	SLI	36.2	This study	-
	B00I2BA	M	Oceania	Solomon Islands	Malaita	SLI	37.5	This study	-
	B00I2BB*	M	Oceania	Solomon Islands	Malaita	SLI	36.8	This study	Het outlier
	B00I2BC	M	Oceania	Solomon Islands	Malaita	SLI	37.7	This study	-
	B00I2BD	M	Oceania	Solomon Islands	Malaita	SLI	35.9	This study	-
	B00I2BE	M	Oceania	Solomon Islands	Malaita	SLI	37	This study	-
	B00I2BF	M	Oceania	Solomon Islands	Malaita	SLI	33.4	This study	-
	B00I2BG	M	Oceania	Solomon Islands	Malaita	SLI	40	This study	-
	B00I2BH	M	Oceania	Solomon Islands	Malaita	SLI	40.4	This study	-
	B00I2BJ	M	Oceania	Solomon Islands	Malaita	SLI	32.1	This study	-
	B00I2BL	M	Oceania	Solomon Islands	Malaita	SLI	36.6	This study	-
	B00I2AI	M	Oceania	Solomon Islands	Santa Cruz	SCI	37.2	This study	-
	B00I2AJ	M	Oceania	Solomon Islands	Santa Cruz	SCI	37.5	This study	-
	B00I2AL	M	Oceania	Solomon Islands	Santa Cruz	SCI	37.1	This study	-
	B00I2AM	M	Oceania	Solomon Islands	Santa Cruz	SCI	37	This study	-
	B00I2AN	M	Oceania	Solomon Islands	Santa Cruz	SCI	35.3	This study	-
	B00I2AO	M	Oceania	Solomon Islands	Santa Cruz	SCI	36.7	This study	-
	B00I2AP	M	Oceania	Solomon Islands	Santa Cruz	SCI	36.4	This study	-
	B00I2AQ	M	Oceania	Solomon Islands	Santa Cruz	SCI	36.9	This study	-
	B00I2AR	M	Oceania	Solomon Islands	Santa Cruz	SCI	37.3	This study	-
	B00I2AS	M	Oceania	Solomon Islands	Santa Cruz	SCI	36.2	This study	-
	B00I2AU	M	Oceania	Solomon Islands	Santa Cruz	SCI	36.4	This study	-
	B00I2AV	M	Oceania	Solomon Islands	Santa Cruz	SCI	34.7	This study	-
	B00I2AX	M	Oceania	Solomon Islands	Santa Cruz	SCI	37.6	This study	-
	B00I2AY	F	Oceania	Solomon Islands	Santa Cruz	SCI	32.4	This study	-
	B00I2BM	M	Oceania	Solomon Islands	Vella Lavella	SLI	37.3	This study	-
	B00I2BN	M	Oceania	Solomon Islands	Vella Lavella	SLI	37	This study	-
	B00I2BP	M	Oceania	Solomon Islands	Vella Lavella	SLI	37.2	This study	-
	B00I2BQ	M	Oceania	Solomon Islands	Vella Lavella	SLI	29.3	This study	-
	B00I2BR*	M	Oceania	Solomon Islands	Vella Lavella	SLI	36.7	This study	Related
	B00I2BS	M	Oceania	Solomon Islands	Vella Lavella	SLI	36.1	This study	-
	B00I2BT	M	Oceania	Solomon Islands	Vella Lavella	SLI	36.7	This study	-
	B00I2BU	M	Oceania	Solomon Islands	Vella Lavella	SLI	34.9	This study	-
	B00I2BV	M	Oceania	Solomon Islands	Vella Lavella	SLI	36.9	This study	-
	B00I2BW	M	Oceania	Solomon Islands	Vella Lavella	SLI	35	This study	-
	B00I2BX	M	Oceania	Solomon Islands	Vella Lavella	SLI	36.8	This study	-
	B00I2BY	F	Oceania	Solomon Islands	Vella Lavella	SLI	36.1	This study	-
	B00I2BZ	F	Oceania	Solomon Islands	Vella Lavella	SLI	35	This study	-
	B00I2C0	F	Oceania	Solomon Islands	Vella Lavella	SLI	34.7	This study	-
	B00I2C1	F	Oceania	Solomon Islands	Vella Lavella	SLI	35	This study	-
	B00I2C2	F	Oceania	Solomon Islands	Vella Lavella	SLI	39	This study	-
	B00I2C3	M	Oceania	Solomon Islands	Vella Lavella	SLI	40.1	This study	-
	B00I2C4	M	Oceania	Solomon Islands	Vella Lavella	SLI	31.6	This study	-
	B00FLG9	M	Oceania	Solomon Islands	Tikopia	POL	30.5	This study	-
	B00FLGD	M	Oceania	Solomon Islands	Tikopia	POL	35.6	This study	-
	B00FLGH	M	Oceania	Solomon Islands	Tikopia	POL	34.8	This study	-
	B00FLGL	M	Oceania	Solomon Islands	Tikopia	POL	34.1	This study	-
	B00FLGP	M	Oceania	Solomon Islands	Tikopia	POL	37.1	This study	-
	B00FLGT	M	Oceania	Solomon Islands	Tikopia	POL	36.3	This study	-
	B00FLGX	M	Oceania	Solomon Islands	Tikopia	POL	29.1	This study	-
	B00FLH1	M	Oceania	Solomon Islands	Tikopia	POL	35.4	This study	PCR-based
	B00FLH5	M	Oceania	Solomon Islands	Tikopia	POL	33.1	This study	-
	B00FLH9	M	Oceania	Solomon Islands	Tikopia	POL	33.7	This study	-
	B00FLHX	M	Oceania	Solomon Islands	Bellona	POL	30.9	This study	PCR-based
	B00FLI1	M	Oceania	Solomon Islands	Bellona	POL	32.1	This study	-
	B00FLI5	M	Oceania	Solomon Islands	Bellona	POL	31.7	This study	-
	B00FLI9*	M	Oceania	Solomon Islands	Bellona	POL	34.8	This study	Het outlier
	B00FLID	M	Oceania	Solomon Islands	Bellona	POL	35.5	This study	-
	B00FLIH	M	Oceania	Solomon Islands	Bellona	POL	33.4	This study	PCR-based
	B00FLIL	M	Oceania	Solomon Islands	Bellona	POL	34.6	This study	PCR-based
	B00FLIP	M	Oceania	Solomon Islands	Bellona	POL	37.1	This study	PCR-based
	B00FLIT	M	Oceania	Solomon Islands	Bellona	POL	35.1	This study	-
	B00FLIX	M	Oceania	Solomon Islands	Bellona	POL	25.9	This study	PCR-based
	B00FLJ1	F	Oceania	Solomon Islands	Bellona	POL	35.2	This study	PCR-based
	B00FLJ5	F	Oceania	Solomon Islands	Bellona	POL	32	This study	PCR-based
	B00FLS1	F	Oceania	Solomon Islands	Bellona	POL	35.6	This study	PCR-based
	B00FLS5	M	Oceania	Solomon Islands	Bellona	POL	33.3	This study	PCR-based
	B00FLS9	M	Oceania	Solomon Islands	Bellona	POL	29.3	This study	-
	B00FLHD	M	Oceania	Solomon Islands	Rennell	POL	34.2	This study	-
	B00FLHH	M	Oceania	Solomon Islands	Rennell	POL	34	This study	-
	B00FLHL	M	Oceania	Solomon Islands	Rennell	POL	30.2	This study	PCR-based
	B00FLHP	M	Oceania	Solomon Islands	Rennell	POL	35.3	This study	-
	B00FLIJ*	F	Oceania	Vanuatu	Ambae	VAN	35.9	This study	Related
	B00FLIN	F	Oceania	Vanuatu	Ambae	VAN	35.2	This study	-
	B00FLIR	F	Oceania	Vanuatu	Ambae	VAN	34.7	This study	-
	B00FLIV	F	Oceania	Vanuatu	Ambae	VAN	33.3	This study	-
	B00FLIZ	F	Oceania	Vanuatu	Ambae	VAN	36.3	This study	-
	B00FLJ3	F	Oceania	Vanuatu	Ambae	VAN	36.9	This study	-
	B00FLJ4	F	Oceania	Vanuatu	Ambae	VAN	35.8	This study	PCR-based
	B00FLJ7*	F	Oceania	Vanuatu	Ambae	VAN	34.2	This study	PCA outlier
	B00FLJ8	F	Oceania	Vanuatu	Ambae	VAN	29.7	This study	-
	B00FLS3	F	Oceania	Vanuatu	Ambae	VAN	32.3	This study	-
	B00FLS4	F	Oceania	Vanuatu	Ambae	VAN	32.1	This study	-
	B00FLS7	F	Oceania	Vanuatu	Ambae	VAN	32.1	This study	-
	B00FLS8*	F	Oceania	Vanuatu	Ambae	VAN	35.6	This study	Related
	B00FLSB	F	Oceania	Vanuatu	Ambae	VAN	32.7	This study	-
	B00FLSC	F	Oceania	Vanuatu	Ambae	VAN	33.7	This study	-
	B00I29Z*	M	Oceania	Vanuatu	Ambrym	VAN	37.2	This study	Related
	B00I2A0	M	Oceania	Vanuatu	Ambrym	VAN	37.6	This study	-
	B00I2A1	M	Oceania	Vanuatu	Ambrym	VAN	37.5	This study	-
	B00I2A2	M	Oceania	Vanuatu	Ambrym	VAN	34	This study	-
	B00I2A3	M	Oceania	Vanuatu	Ambrym	VAN	38.9	This study	-
	B00I2A4	M	Oceania	Vanuatu	Ambrym	VAN	36.1	This study	-
	B00I2A5	M	Oceania	Vanuatu	Ambrym	VAN	37.4	This study	-
	B00I2A6*	M	Oceania	Vanuatu	Ambrym	VAN	37	This study	Het outlier
	B00I2A7	F	Oceania	Vanuatu	Ambrym	VAN	37.6	This study	-
	B00I2A8	F	Oceania	Vanuatu	Ambrym	VAN	33.9	This study	-
	B00I2A9	F	Oceania	Vanuatu	Ambrym	VAN	36.5	This study	-
	B00I2AA	F	Oceania	Vanuatu	Ambrym	VAN	36.8	This study	-
	B00I2AB*	F	Oceania	Vanuatu	Ambrym	VAN	36.9	This study	Related
	B00I2AC	F	Oceania	Vanuatu	Ambrym	VAN	37.5	This study	-
	B00I2AD	F	Oceania	Vanuatu	Ambrym	VAN	35.9	This study	-
	B00I2AE	F	Oceania	Vanuatu	Ambrym	VAN	36.2	This study	-
	B00I2AF	F	Oceania	Vanuatu	Ambrym	VAN	37.4	This study	-
	B00I2AG*	F	Oceania	Vanuatu	Ambrym	VAN	37.1	This study	Related
	B00I2AH	F	Oceania	Vanuatu	Ambrym	VAN	36.7	This study	-
	B00I2DI	M	Oceania	Vanuatu	Ambrym	VAN	36.7	This study	-
	B00FLSD	F	Oceania	Vanuatu	Efate	VAN	33.5	This study	PCR-based
	B00I28U	M	Oceania	Vanuatu	Efate	VAN	37.1	This study	-
	B00I28V	M	Oceania	Vanuatu	Efate	VAN	36.8	This study	-
	B00I28W	M	Oceania	Vanuatu	Efate	VAN	38.1	This study	-
	B00I28X	M	Oceania	Vanuatu	Efate	VAN	30.1	This study	-
	B00I28Y	M	Oceania	Vanuatu	Efate	VAN	36.7	This study	-
	B00I28Z	M	Oceania	Vanuatu	Efate	VAN	37.5	This study	-
	B00I290	M	Oceania	Vanuatu	Efate	VAN	37.6	This study	-
	B00I291	M	Oceania	Vanuatu	Efate	VAN	36.3	This study	-
	B00I292	M	Oceania	Vanuatu	Efate	VAN	36.6	This study	-
	B00I293	M	Oceania	Vanuatu	Efate	VAN	37.3	This study	-
	B00I294	F	Oceania	Vanuatu	Efate	VAN	32.9	This study	-
	B00I295	F	Oceania	Vanuatu	Efate	VAN	37	This study	-
	B00I296	F	Oceania	Vanuatu	Efate	VAN	36.5	This study	-
	B00I297	F	Oceania	Vanuatu	Efate	VAN	32.3	This study	-
	B00I298*	F	Oceania	Vanuatu	Efate	VAN	35.7	This study	Related
	B00I299	F	Oceania	Vanuatu	Efate	VAN	37.3	This study	-
	B00I29A*	F	Oceania	Vanuatu	Efate	VAN	36.9	This study	Het outlier
	B00I29B	F	Oceania	Vanuatu	Efate	VAN	37	This study	-
	B00I29C	F	Oceania	Vanuatu	Efate	VAN	36.8	This study	-
	B00I29D	F	Oceania	Vanuatu	Efate	VAN	36.3	This study	-
	B00FLII	M	Oceania	Vanuatu	Emae	VAN	35.4	This study	PCR-based
	B00FLIK	F	Oceania	Vanuatu	Emae	VAN	37.9	This study	-
	B00FLIM	M	Oceania	Vanuatu	Emae	VAN	35.3	This study	-
	B00FLIO	F	Oceania	Vanuatu	Emae	VAN	35.1	This study	-
	B00FLIQ	M	Oceania	Vanuatu	Emae	VAN	35.1	This study	-
	B00FLIS	F	Oceania	Vanuatu	Emae	VAN	37.3	This study	-
	B00FLIU*	M	Oceania	Vanuatu	Emae	VAN	34.8	This study	Related
	B00FLIW	F	Oceania	Vanuatu	Emae	VAN	37.3	This study	-
	B00FLIY	M	Oceania	Vanuatu	Emae	VAN	31.2	This study	-
	B00FLJ0	F	Oceania	Vanuatu	Emae	VAN	37.6	This study	-
	B00FLJ2	M	Oceania	Vanuatu	Emae	VAN	38.5	This study	-
	B00FLJ6	M	Oceania	Vanuatu	Emae	VAN	37.2	This study	-
	B00FLS2	M	Oceania	Vanuatu	Emae	VAN	32	This study	-
	B00FLS6	M	Oceania	Vanuatu	Emae	VAN	36.2	This study	PCR-based
	B00FLSA*	F	Oceania	Vanuatu	Emae	VAN	35.4	This study	PCR-based; Related
	B00I2CQ	M	Oceania	Vanuatu	Espiritu Santo	VAN	39.6	This study	-
	B00I2CR	F	Oceania	Vanuatu	Espiritu Santo	VAN	38.4	This study	-
	B00I2CS	F	Oceania	Vanuatu	Espiritu Santo	VAN	38.2	This study	-
	B00I2CT	F	Oceania	Vanuatu	Espiritu Santo	VAN	38.6	This study	-
	B00I2CU	M	Oceania	Vanuatu	Espiritu Santo	VAN	37.9	This study	-
	B00I2CV	M	Oceania	Vanuatu	Espiritu Santo	VAN	29.3	This study	-
	B00I2CW	F	Oceania	Vanuatu	Espiritu Santo	VAN	32	This study	-
	B00I2CX*	M	Oceania	Vanuatu	Espiritu Santo	VAN	49.1	This study	Related
	B00I2CY*	M	Oceania	Vanuatu	Espiritu Santo	VAN	46.9	This study	Related
	B00I2CZ	M	Oceania	Vanuatu	Espiritu Santo	VAN	40.5	This study	-
	B00I2D0	M	Oceania	Vanuatu	Espiritu Santo	VAN	41.5	This study	-
	B00I2D1*	F	Oceania	Vanuatu	Espiritu Santo	VAN	33.4	This study	Related
	B00I2D2	F	Oceania	Vanuatu	Espiritu Santo	VAN	37.1	This study	-
	B00I2D3	F	Oceania	Vanuatu	Espiritu Santo	VAN	37.5	This study	-
	B00I2D4	F	Oceania	Vanuatu	Espiritu Santo	VAN	35.7	This study	-
	B00I2D5	F	Oceania	Vanuatu	Espiritu Santo	VAN	35.9	This study	-
	B00I2D6	F	Oceania	Vanuatu	Espiritu Santo	VAN	36.4	This study	-
	B00I2D7	F	Oceania	Vanuatu	Espiritu Santo	VAN	36.6	This study	-
	B00I2D8	M	Oceania	Vanuatu	Espiritu Santo	VAN	35.7	This study	-
	B00I2D9	M	Oceania	Vanuatu	Espiritu Santo	VAN	37.1	This study	-
	B00I2DA	F	Oceania	Vanuatu	Maewo	VAN	32.8	This study	-
	B00I2DB	F	Oceania	Vanuatu	Maewo	VAN	36.6	This study	-
	B00I2DC	F	Oceania	Vanuatu	Maewo	VAN	36.8	This study	-
	B00I2DD	F	Oceania	Vanuatu	Maewo	VAN	35.7	This study	-
	B00I2DE	F	Oceania	Vanuatu	Maewo	VAN	37.2	This study	-
	B00I2DF	F	Oceania	Vanuatu	Maewo	VAN	36.5	This study	-
	B00I2DG*	F	Oceania	Vanuatu	Maewo	VAN	33.8	This study	PCA outlier - Dstat
	B00I2DH*	F	Oceania	Vanuatu	Maewo	VAN	37	This study	PCA outlier - Dstat
	B00I2C6*	M	Oceania	Vanuatu	Malakula	VAN	27.8	This study	Het outlier
	B00I2C7	F	Oceania	Vanuatu	Malakula	VAN	37.5	This study	-
	B00I2C8	M	Oceania	Vanuatu	Malakula	VAN	37.8	This study	-
	B00I2C9	F	Oceania	Vanuatu	Malakula	VAN	36.7	This study	-
	B00I2CA	M	Oceania	Vanuatu	Malakula	VAN	37.2	This study	-
	B00I2CB	F	Oceania	Vanuatu	Malakula	VAN	37.7	This study	-
	B00I2CC	M	Oceania	Vanuatu	Malakula	VAN	37.9	This study	-
	B00I2CD*	M	Oceania	Vanuatu	Malakula	VAN	38.1	This study	Related
	B00I2CE	M	Oceania	Vanuatu	Malakula	VAN	38	This study	-
	B00I2CF	M	Oceania	Vanuatu	Malakula	VAN	38.3	This study	-
	B00I2CG	M	Oceania	Vanuatu	Malakula	VAN	37.7	This study	-
	B00I2CH	F	Oceania	Vanuatu	Malakula	VAN	37.4	This study	-
	B00I2CI	M	Oceania	Vanuatu	Malakula	VAN	37.4	This study	-
	B00I2CJ*	M	Oceania	Vanuatu	Malakula	VAN	37.8	This study	Related
	B00I2CK	M	Oceania	Vanuatu	Malakula	VAN	37.5	This study	-
	B00I2CL	F	Oceania	Vanuatu	Malakula	VAN	37.1	This study	-
	B00I2CM	F	Oceania	Vanuatu	Malakula	VAN	36.8	This study	-
	B00I2CN	M	Oceania	Vanuatu	Malakula	VAN	36.5	This study	-
	B00I2CO	M	Oceania	Vanuatu	Malakula	VAN	38.2	This study	-
	B00I2CP	F	Oceania	Vanuatu	Malakula	VAN	36	This study	-
	B00I29E	F	Oceania	Vanuatu	Pentecost	VAN	37.2	This study	-
	B00I29F	F	Oceania	Vanuatu	Pentecost	VAN	33.7	This study	-
	B00I29G*	F	Oceania	Vanuatu	Pentecost	VAN	36.2	This study	Related
	B00I29H	F	Oceania	Vanuatu	Pentecost	VAN	37.6	This study	-
	B00I29I	F	Oceania	Vanuatu	Pentecost	VAN	37.7	This study	-
	B00I29J*	F	Oceania	Vanuatu	Pentecost	VAN	36.6	This study	Related
	B00I29K*	F	Oceania	Vanuatu	Pentecost	VAN	33.6	This study	Related
	B00I29L	F	Oceania	Vanuatu	Pentecost	VAN	37	This study	-
	B00I29M	F	Oceania	Vanuatu	Pentecost	VAN	35.4	This study	-
	B00I29N	F	Oceania	Vanuatu	Pentecost	VAN	35.9	This study	-
	B00I29O	F	Oceania	Vanuatu	Pentecost	VAN	35.4	This study	-
	B00I29P	F	Oceania	Vanuatu	Pentecost	VAN	38	This study	-
	B00I29Q*	F	Oceania	Vanuatu	Pentecost	VAN	37.2	This study	Het outlier
	B00I29R*	F	Oceania	Vanuatu	Pentecost	VAN	36.6	This study	Related
	B00I29S	F	Oceania	Vanuatu	Pentecost	VAN	37.2	This study	-
	B00I29T*	F	Oceania	Vanuatu	Pentecost	VAN	37.3	This study	Related
	B00I29U*	F	Oceania	Vanuatu	Pentecost	VAN	35.8	This study	Related
	B00I29V	F	Oceania	Vanuatu	Pentecost	VAN	35	This study	-
	B00I29W	F	Oceania	Vanuatu	Pentecost	VAN	37.1	This study	-
	B00I29X	F	Oceania	Vanuatu	Pentecost	VAN	35.7	This study	-
	B00I27Q	M	Oceania	Vanuatu	Tanna	VAN	34.5	This study	-
	B00I27R	M	Oceania	Vanuatu	Tanna	VAN	36.6	This study	-
	B00I27S*	M	Oceania	Vanuatu	Tanna	VAN	38.8	This study	Related
	B00I27T	M	Oceania	Vanuatu	Tanna	VAN	39.1	This study	-
	B00I27U	M	Oceania	Vanuatu	Tanna	VAN	37.3	This study	-
	B00I27V	M	Oceania	Vanuatu	Tanna	VAN	37.6	This study	-
	B00I27W*	M	Oceania	Vanuatu	Tanna	VAN	38.4	This study	Related
	B00I27X	M	Oceania	Vanuatu	Tanna	VAN	38.2	This study	-
	B00I27Y	M	Oceania	Vanuatu	Tanna	VAN	37.7	This study	-
	B00I27Z	M	Oceania	Vanuatu	Tanna	VAN	37.5	This study	-
	B00I280*	M	Oceania	Vanuatu	Tanna	VAN	37.5	This study	Het outlier
	B00I281	M	Oceania	Vanuatu	Tanna	VAN	37.7	This study	-
	B00I282	F	Oceania	Vanuatu	Tanna	VAN	37.6	This study	-
	B00I283	F	Oceania	Vanuatu	Tanna	VAN	36.5	This study	-
	B00I284	F	Oceania	Vanuatu	Tanna	VAN	35.7	This study	-
	B00I285	F	Oceania	Vanuatu	Tanna	VAN	36.4	This study	-
	B00I286	F	Oceania	Vanuatu	Tanna	VAN	36.7	This study	-
	B00I287	F	Oceania	Vanuatu	Tanna	VAN	36.3	This study	-
	B00I288	F	Oceania	Vanuatu	Tanna	VAN	36.9	This study	-
	B00I289	F	Oceania	Vanuatu	Tanna	VAN	37.5	This study	-
	B00I28A	M	Oceania	Vanuatu	Ureparapara	VAN	36.4	This study	-
	B00I28B*	M	Oceania	Vanuatu	Ureparapara	VAN	37.3	This study	Related
	B00I28C	M	Oceania	Vanuatu	Ureparapara	VAN	36.3	This study	-
	B00I28D	M	Oceania	Vanuatu	Ureparapara	VAN	37.9	This study	-
	B00I28E	M	Oceania	Vanuatu	Ureparapara	VAN	36.9	This study	-
	B00I28F	F	Oceania	Vanuatu	Ureparapara	VAN	37.5	This study	-
	B00I28G	F	Oceania	Vanuatu	Ureparapara	VAN	36.6	This study	-
	B00I28H*	F	Oceania	Vanuatu	Ureparapara	VAN	37.4	This study	PCA outlier - Dstat
	B00I28I	M	Oceania	Vanuatu	Ureparapara	VAN	32.5	This study	-
	B00I28J*	F	Oceania	Vanuatu	Ureparapara	VAN	34.7	This study	Related
	B00I28K	F	Oceania	Vanuatu	Ureparapara	VAN	36.2	This study	-
	B00I28L*	F	Oceania	Vanuatu	Ureparapara	VAN	35.1	This study	Related
	B00I28M	F	Oceania	Vanuatu	Ureparapara	VAN	36.8	This study	-
	B00I28N	M	Oceania	Vanuatu	Ureparapara	VAN	37.2	This study	-
	B00I28O	F	Oceania	Vanuatu	Ureparapara	VAN	34.7	This study	-
	B00I28P*	F	Oceania	Vanuatu	Ureparapara	VAN	36.2	This study	Related
	B00I28Q*	F	Oceania	Vanuatu	Ureparapara	VAN	37.1	This study	Related
	B00I28R*	F	Oceania	Vanuatu	Ureparapara	VAN	32.8	This study	Related
	B00I28S	M	Oceania	Vanuatu	Ureparapara	VAN	35.4	This study	-
	B00I28T	M	Oceania	Vanuatu	Ureparapara	VAN	36.4	This study	-
	LP6005592-DNA_H03	M	Oceania	United States of America	Hawaiian	POL	36.8	Mallick et al. 2016	-
	LP6005592-DNA_B02	M	Oceania	New Zealand	Maori	POL	31.9	Mallick et al. 2016	-
	*indicates excluded samples, based on at least one of the three criteria indicated in the Note column:
	European or African ancestry ('PCA outlier - Dstat'); cryptic relatedness ('Related'); excess or default in heterozygousity ('Het outlier')
	PCR-based in the Note column indicates PCR-based library preparation

## Sheet: Table S02
	Supplementary Table 2. Parameter estimates for the baseline model
	Parameter	Search range		Model (PNG,(EUR,ASN))	Confidence interval (95%CI)		Replicate: TWN replaced by PHP (Kankanaey)	Model (EUR,(PNG,ASN))
	Ne (diploids)	Lower bound	Upper bound	Point estimate	Lower bound	Upper bound	Point estimate	Point estimate
	Hominins	50	50,000	20,048	20,051	21,287	20,567	19,863
	Altai Denisovan	50	5,000	2,719	2,217	2,819	2,429	2,228
	Denisova related	50	50,000	3,316	2,642	17,969	5,686	18,541
	Vindija Neanderthal	50	5,000	975	802	1,166	813	860
	Neanderthal related	50	50,000	5,759	4,556	6,083	4,701	6,440
	Ancestral modern humans	50	50,000	24,292	20,638	26,006	19,396	30,402
	"Out-Of-Africa" (OoA) bottleneck	5	2,500	411	364	795	970	347
	European bottleneck	5	2,500	-	-	-	-	1,040
	Eurasian bottleneck	5	2,500	1,822	395	2,174	359	-
	PNG/East Asian bottleneck	5	2,500	-	-	-	-	903
	PNG bottleneck	5	2,500	247	140	285	127	-
	Ancestral PNG/East Asians	50	50,000	-	-	-	-	37,506
	Ancestral Eurasians	50	50,000	22,089	12,374	43,748	24,310	-
	Han Chinese (HAN)	50	50,000	6,735	5,598	7,001	5,549	7,039
	Europeans (SAR)	50	50,000	3,642	2,671	3,978	3,411	6,823
	Continent PNG	50	50,000	3,526	3,235	3,754	3,669	1,865
	Kundiawa (PNG)	50	50,000	27,831	9,278	36,052	15,706	4,790
	Bundi (PNG)	50	50,000	9,724	4,785	36,622	14,043	8,714
	Paiwan Taiwanese aborigines (TWN)	50	50,000	1,612	1,358	2,156	1,572	1,972
	Timing of event (ya)	Lower bound	Upper bound	Point estimate	Lower bound	Upper bound	Point estimate	Point estimate
	Archaic/modern humans split	551,029	783,000	606,091	566,712	616,638	597,542	638,972
	Denisovans/Neanderthals split	406,029	493,000	493,507	462,969	498,877	499,398	501,378
	Denisovans split	275,500	406,000	407,382	370,386	409,377	370,016	376,406
	Neanderthals split	89,900	136,300	122,154	107,174	128,826	97,728	123,300
	YRB/OoA Ghost split*	-	-	127,194	-	-	127,194	127,194
	OoA bottleneck	29,000	YRB/OoA Ghost split*	66,226	61,902	69,107	90,921	61,262
	OoA Ghost/PNG-East Asians split	7,250	OoA bottleneck	-	-	-	-	57,741
	OoA Ghost/PNG split	7,250	OoA bottleneck	57,933	52,700	60,283	61,080	-
	OoA Ghost/Europeans split	7,250	OoA Ghost/PNG-East Asians split	-	-	-	-	43,806
	OoA Ghost/Eurasians split	7,250	OoA Ghost/PNG split	57,021	51,889	58,774	57,038	-
	PNG/East Asians split	5,800	OoA Ghost/PNG-East Asians split	-	-	-	-	38,166
	Europeans/East Asians split	5,800	OoA Ghost/Eurasians split	47,179	42,082	48,755	44,197	-
	HAN/TWN split	2,900	Europeans/East Asians split	8,445	5,775	13,296	15,129	7,251
	Neanderthals > non-Africans pulse	OoA Ghost/PNG split	OoA bottleneck	61,153	56,355	62,361	76,030	57,920
	Neanderthals > Eurasians pulse	Europeans/East Asians split	OoA Ghost/Eurasians split	52,252	46,986	54,184	48,804	34,048
	Denisovans > PNG pulse	(OoA Ghost/PNG split) x 0.5	OoA Ghost/PNG split	42,379	34,850	43,795	46,308	20,411
	Admixture proportion (%)	Lower bound	Upper bound	Point estimate	Lower bound	Upper bound	Point estimate	Point estimate
	Neanderthals > non-Africans pulse	0.0001	10	2.214	1.515	2.688	2.481	2.467
	Neanderthals > Eurasians pulse	0.0001	10	0.359	0.358	1.861	1.528	1.631
	Denisovans > PNG pulse	3	6	3.61	3.21	4.078	3.929	4.374
	Migration	Lower rate	Upper rate	Scaled migration rate (2Nm)	Lower bound	Upper bound	Scaled migration rate (2Nm)	Scaled migration rate (2Nm)
	OoA Ghost > Europeans Europeans > OoA Ghost Ghost > Ancestral Eurasia Ancestral Eurasia > Ghost	1e-06	0.001	5.32 7.29 7.29	3.44 4.64 15.4 4.64	5.65 8.01 63.0 8.01	3.29 4.72 23.5 4.72	4.46 3.20 - -
	Europeans > East Asians East Asians > Europeans	1e-06	0.001	0.1 0.06	0.05 0.03	0.25 0.11	0.08 0.05	0.36 0.35
	HAN > TWN TWN > HAN	1e-06	0.001	2.81 11.67	0.3 0.98	3.23 12.0	1.74 6.16	0.06 0.20
	PNG > TWN TWN > PNG	1e-06	0.001	0.03 0.07	0.02 0.04	0.08 0.16	0.02 0.04	0.18 0.17
	East Asians > PNG PNG > East Asians	1e-06	0.001	0.48 0.92	0.28 0.49	0.65 1.25	0.66 1	0.04 0.17
	Europeans > PNG-East Asians PNG-East Asians > Europeans	1e-06	0.001	-	-	-	-	6.49 1.18
	Eurasians > PNG PNG > Eurasians	1e-06	0.001	3.58 22.44	2.73 10.4	5.25 48.0	6.40 42.4	-
	* indicates parameters fixed to point estimates from a previous model (Malaspinas et al., Nature 2016)
	All parameters were drawn from a uniform distribution between reported search ranges, except migration rates for which the distribution was log-uniform.
	Results in gray are those for the best-fitted model (ΔML > 1,000 log10 units, Supplementary Fig. 12c)

## Sheet: Table S03
	Supplementary Table 3. Parameter estimates for the model of Near Oceanians
	Parameter	Search range		Model (PNG,(BKA,SLI))	Confidence interval (95%CI)		Replicate (SLI=Malaita)	Model (SLI,(PNG,BKA))	Model (BKA,(PNG,SLI))
	Ne (diploids)	Lower bound	Upper bound	Point estimate	Lower bound	Upper bound	Point estimate	Point estimate	Point estimate
	NOC bottleneck	5	2,500	2,661	327	2,666	1,063	571	1,683
	Ancestral all NOC	50	50,000	1,323	1,217	2,776	1,633	2,136	1,502
	Ancestral second NOC	50	50,000	18,945	6,629	43,587	31,651	17,187	21,054
	Kundiawa (PNG)	50	50,000	3,660	3,433	4,689	4,373	3,824	4,086
	Nakanai Bileki (BKA)	50	50,000	2,864	1,747	3,740	2,264	2,170	2,634
	Vella Lavella (SLI)	50	50,000	3,791	2,628	4,606	3,503	3,803	4,916
	Timing of events (ya)	Lower bound	Upper bound	Point estimate	Lower bound	Upper bound	Point estimate	Point estimate	Point estimate
	First NOC split	HAN/TWN split*	Europeans/East Asians split*	34,086	29,885	37,857	30,257	28,668	34,052
	Second NOC split	HAN/TWN split*	First NOC split	16,048	12,279	29,037	10,641	27,090	31,016
	Denisovans > all NOC pulse	Second NOC split	OoA Ghost/PNG split*	37,296	33,504	44,035	35,548	32,479	36,883
	TWN > BKA-SLI pulse	29	HAN/TWN split*	5,884	3,987	6,659	5,944	6,787	5,248
	Admixture proportions (%)	Lower bound	Upper bound	Point estimate	Lower bound	Upper bound	Point estimate	Point estimate	Point estimate
	TWN > BKA pulse	1e-05	1	27.864	23.588	30.955	20.516	30.151	25.491
	TWN > SLI pulse	1e-05	1	39.804	34.733	42.061	44.439	43.239	36.968
	Migrations	Lower 2Nm	Upper 2Nm	Scaled migration rate (2Nm)	Lower bound	Upper bound	Scaled migration rate (2Nm)	Scaled migration rate (2Nm)	Scaled migration rate (2Nm)
	PNG > TWN TWN > PNG	0.0001	100	0.002 0.005	0.0005 0.001	0.12 0.28	0.0006 0.002	0.003 0.008	0.003 0.008
	East Asians > PNG PNG > East Asians	0.0001	100	0.61 1.15	0.38 0.60	0.68 1.24	0.66 1.04	0.53 0.96	0.54 0.90
	BKA > PNG	0.0001	100	1	0.0004	1.11	0.38	0.3	0.02
	PNG > BKA	0.0001	100	2.2	1.88	4.21	0.88	2.56	2.52
	SLI > BKA	0.0001	100	2.58	0.14	5.05	6.48	4.42	4.22
	BKA > SLI	0.0001	100	0.02	0.003	3.45	3.33	0.07	0.05
	Ancestral second NOC > First NOC	0.0001	100	0.002	0.0006	3.38	0.02	10.5	0.0006
	First NOC > Ancestral second NOC	0.0001	100	0.68	0.002	7.56	0.75	0.52	1.07
	* indicates parameters fixed to point estimates obtained in the baseline model (Supplementary Table 2)
	NOC stands for Near Oceania(n)
	All parameters were drawn from a uniform distribution between reported search ranges, except migration and admixture rates for which the distribution was log-uniform.
	Model (PNG,(SLI,BKA))
	Timing of events (ya)	Mutation rate (mut/site/generation)
		1.4x10-8	1.25x10-8 (this study)
	First NOC split	30,434	34,086
	Second NOC split	14,328	16,048
	Denisovans > Ancestral all NOC pulse	33,300	37,296
	TWN > BKA-SLI pulse	5,254	5,884

## Sheet: Table S04
	Supplementary Table 4. Parameter estimates for the refined model of Near Oceanians
	Parameter	Search range		Model (SLI,(NOC Ghost, BKA))	Model (BKA,(NOC Ghost, SLI))	Confidence interval (95%CI)		Replicate (SLI=Malaita)	Independent bottlenecks (SLI=Vella Lavella)
	Ne (diploids)	Lower bound	Upper bound	Point estimate	Point estimate	Lower bound	Upper bound	Point estimate	Point estimate
	NOC bottleneck	5	2,500	271	214	186	276	222	276
	SLI bottleneck	5	2,500	-	-	-	-	-	1,661
	BKA bottleneck	5	2,500	-	-	-	-	-	1,139
	PNG bottleneck	5	2,500	-	-	-	-	-	221
	NOC Ghost bottleneck	5	2,500	-	-	-	-	-	1,729
	Ancestral NOC	50	50,000	16,738	34,325	5,389	47,465	10,618	20,768
	NOC Ghost	50	50,000	38,577	32,421	16,939	46,684	44,404	13,223
	Kundiawa (PNG)	50	50,000	1,695	1,348	1,177	1,747	1,581	1,643
	Nakanai Bileki (BKA)	50	50,000	306	707	577	1,843	801	1,337
	Vella Lavella (SLI)	50	50,000	1,976	2,813	1,549	3,877	2,860	3,968
	Timing of event (ya)	Lower bound	Upper bound	Point estimate	Point estimate	Lower bound	Upper bound	Point estimate	Point estimate
	PNG/NOC Ghost split	HAN/TWN split*	Europeans/East Asians split*	45,023	38,535	34,330	45,110	46,941	35,764
	Archipelago 1/NOC Ghost split	HAN/TWN split*	PNG/NOC Ghost split	31,874	24,880	20,029	36,111	16,858	23,526
	Archipelago 2/NOC Ghost split	HAN/TWN split*	Archipelago 1/NOC Ghost split	19,870	19,904	15,846	29,767	9,442	21,565
	Denisovans > Ancestral NOC pulse	PNG/NOC Ghost split	Ghost OoA/PNG split*	54,914	51,834	43,547	53,768	50,723	53,022
	TWN > BKA-SLI pulse	29	HAN/TWN split*	2,964	4,087	3,233	5,540	4,994	4,485
	Admixture proportion (%)	Lower bound	Upper bound	Point estimate	Point estimate	Lower bound	Upper bound	Point estimate	Point estimate
	TWN > BKA pulse	1e-05	1	82.086	42.876	26.97	58.408	0.122	27.532
	TWN > SLI pulse	1e-05	1	30.344	34.769	31.729	38.698	44.004	33.114
	Migration	Lower 2Nm	Upper 2Nm	scaled migration rate (2Nm)	scaled migration rate (2Nm)	Lower bound	Upper bound	scaled migration rate (2Nm)	scaled migration rate (2Nm)
	PNG > TWN TWN > PNG	0.0001	100	0.022 0.023	0.003 0.003	0.0004 0.0003	0.049 0.045	0.024 0.023	0.003 0.003
	East Asians > PNG PNG > East Asians	0.0001	100	0.22 0.42	0.17 0.88	0.099 0.48	0.23 1.14	0.16 0.72	0.17 0.74
	PNG > NOC Ghost NOC Ghost > PNG	0.0001	100	84.00 3.69	135.9 5.65	51.56 4	233 10.28	137.0 4.88	46.4 5.77
	NOC Ghost > BKA	0.0001	100	6.81	5.6	4.18	7.13	2.12	5.02
	BKA > NOC Ghost	0.0001	100	0.87	0.014	0.0007	9.46	35	0.01
	SLI > BKA	0.0001	100	3.02	2.68	0.12	4.58	9.75	3.23
	BKA > SLI	0.0001	100	6.71	2.19	0.005	6.56	0.095	0.02
	* indicates parameters fixed to point estimates obtained in the baseline model (Supplementary Table 2)
	NOC stands for Near Oceania(n)
	All parameters were drawn from a uniform distribution between reported search ranges, except migration and admixture rates for which the distribution was log-uniform.
	Results in gray are those for the best-fitted model (ΔML = 65 log10 units, Supplementary Fig. 21b)
	Model(BKA,(NOC GST,SLI))
	Timing of events (ya)	Mutation rate (mut/site/generation)
		1.4x10-8	1.25x10-8 (this study)
	PNG/NOC Ghost split	34,406	38,535
	Archipelago 1/NOC Ghost split	22,214	24,880
	Archipelago 2/NOC Ghost split	17,772	19,904
	Denisovans > Ancestral NOC pulse	46,280	51,834
	TWN > BKA/SLI pulse	3,650	4,087

## Sheet: Table S05
	Supplementary Table 5. Parameter estimates for the model of western Remote Oceanians
	Parameter	Search range		Model (VAN,SLI)	Confidence interval (95%CI)		Model (VAN,BKA)	Model (VAN,PNG)	Confidence interval (95%CI)		Replicate (VAN = Emae)	Model (VAN,TWN)
	Ne (diploids)	Lower bound	Upper bound	Point estimate	Lower bound	Upper bound	Point estimate	Point estimate	Lower bound	Upper bound	Point estimate	Point estimate
	Malakula (VAN)	50	50,000	13,396	5,693	35,387	35,006	31,798	8,688	43,306	3,013	36,588
	Timing of event (ya)	Lower bound	Upper bound	Point estimate	Lower bound	Upper bound	Point estimate	Point estimate	Lower bound	Upper bound	Point estimate	Point estimate
	VAN/NOC split	29	SLI/NOC Ghost split**	12,398	9,596	16,030	2,428	16,091	12,031	18,444	18,058	-
	VAN/TWN split	29	HAN/TWN split*	-	-	-	-	-	-	-	-	7,827
	TWN > BKA-SLI pulse	29	HAN/TWN split*	4,685	2,884	6,307	2,284	4,347	2,598	5,812	6,105	1,813
	TWN > VAN pulse	29	min(VAN/NOC split;HAN/TWN split*)	3,399	1,126	7,321	838	2,015	1,102	7,498	2,379	-
	BKA > VAN pulse	29	VAN / NOC split	1,086	141	1,482	-	461	242	1,516	1,978	1,842
	SLI > VAN pulse	29	VAN / NOC split	-	-	-	780	6,765	4,063	11,339	4,959	2,244
	PNG > VAN pulse	29	VAN / NOC split	9,113	6,308	12,641	1,243	-	-	-	-	5,755
	Admixture proportion (%)	Lower bound	Upper bound	Point estimate	Lower bound	Upper bound	Point estimate	Point estimate	Lower bound	Upper bound	Point estimate	Point estimate
	TWN > BKA pulse	1e-05	1	42.207	25.159	58.843	29.162	37.016	26.769	56.477	52.955	22.563
	TWN > SLI pulse	1e-05	1	34.88	31.173	40.0143	31.327	35.719	30.333	38.326	37.617	29.981
	TWN > VAN pulse	1e-05	1	0.0482	0.004	1.583	6.435	0.0202	0.008	2.5	0.006	-
	BKA > VAN pulse	1e-05	1	34.256	30.853	43.387	-	39.056	33.541	48.308	58.793	71.559
	SLI > VAN pulse	1e-05	1	-	-	-	15.686	24.225	13.978	41.193	5.219	0.012
	PNG > VAN pulse	1e-05	1	43.97	27.135	56.682	14.874	-			-	59.463
	Migration	Lower 2Nm	Upper 2Nm	scaled migration rate (2Nm)	Lower bound	Upper bound	scaled migration rate (2Nm)	scaled migration rate (2Nm)	Lower bound	Upper bound	scaled migration rate (2Nm)	scaled migration rate (2Nm)
	PNG > NOC Ghost NOC Ghost > PNG	0.0001	100	111.2 4.63	101.1 4.20	147.6 6.14	102.1 4.25	116.05 4.83	98.3 4.09	141.1 5.87	136.2 5.66	98.5 4.10
	NOC Ghost > BKA	0.0001	100	6.03	4.27	6.53	5.6	4.83	4.26	6.65	5.57	5.92
	BKA > NOC Ghost	0.0001	100	0.1	0.001	8.08	0.83	0.2	0.001	2.92	0.1	0.07
	SLI > BKA	0.0001	100	3.55	2.6	4.72	2.67	4.19	2.31	5.19	5.05	3.17
	BKA > SLI	0.0001	100	3.14	0.002	3.23	0.31	0.74	0.009	3.3	3.53	1.2
	* indicates parameters fixed to point estimates obtained in the baseline model (Supplementary Table 2)
	** indicates parameters fixed to point estimates obtained in the refining demographic history of Near Oceania (Supplementary Table 4)
	NOC stands for Near Oceania(n)
	All parameters were drawn from a uniform distribution between reported search ranges, except migration and admixture rates for which the distribution was log-uniform.
	Results in gray are those for the two best-fitted models (ΔML = 37 log10 units, Supplementary Fig. 27)
	Model(VAN,PNG)
	Timing of events (ya)	Mutation rate (mut/site/generation)
		1.4x10-8	1.25x10-8 (this study)
	VAN/NOC split	14,367	16,091
	VAN/TWN split	-	-
	TWN > BKA-SLI pulse	3,881	4,347
	TWN > VAN pulse	1,799	2,015
	BKA > VAN pulse	411	461
	SLI > VAN pulse	6,040	6,765
	PNG > VAN pulse	-	-

## Sheet: Table S06 PHP
	Supplementary Table 6. Parameter estimates for the model of East/Southeast Asians
	Parameter	Search range		Model (TWN,PHP)	Confidence interval (95%CI)
	Ne (diploids)	Lower bound	Upper bound	Point estimate	Lower bound	Upper bound
	Kankanaey (PHP)	50	50,000	5,906	1,862	36,437
	Paiwan Taiwanese aborigines (TWN)	50	50,000	2,162	1,095	7,149
	Han Chinese (HAN)	50	50,000	12,077	10,069	19,161
	PHP bottleneck	5	2,500	1,816	163	2,154
	TWN bottleneck	5	2,500	1,383	381	1,984
	Ancestral HAN-TWN-PHP	50	50,000	32,235	7,071	48,708
	Ancestral TWN-PHP	50	50,000	1,174	956	1,528
	Timing of event (ya)	Lower bound	Upper bound	Point estimate	Lower bound	Upper bound
	HAN/TWN-PHP split	5,800	Europeans/East Asians split*	45,459	42,713	47,381
	TWN/PHP split	435	HAN/TWN-PHP split	15,172	9,178	18,451
	Migration	Lower 2Nm	Upper 2Nm	scaled migration rate (2Nm)	Lower bound	Upper bound
	PNG > Ancestral HAN-TWN-PHP Ancestral HAN-TWN-PHP > PNG	0.0001	100	92.7 13.2	22.03 7.15	330.4 47.6
	HAN > Ancestral TWN-PHP Ancestral TWN-PHP > HAN	0.0001	100	5.54 56.9	3.51 32.4	7.58 93.3
	HAN > TWN	0.0001	100	6.37	1.93	7.73
	TWN > HAN	0.0001	100	0.0009	0.001	24.44
	TWN > PHP	0.0001	100	3.7	0.001	9.1
	PHP > TWN	0.0001	100	1.21	0.0005	3.06
	* indicates parameters fixed to point estimates obtained in the baseline model (Supplementary Table 2)
	All parameters were drawn from a uniform distribution between reported search ranges, except migration rates for which the distribution was log-uniform.
	Model (TWN,PHP)
	Timing of events (ya)	Mutation rate (mut/site/generation)
		1.4x10-8	1.25x10-8 (this study)
	HAN/TWN-PHP split	40,589	45,459
	TWN/PHP split	13,547	15,172

## Sheet: Table S06 PHP POL
	Supplementary Table 6. Parameter estimates for the model East/Southeast Asians
	Parameter	Search range		Model (TWN,(PHP,POL))	Confidence interval (95%CI)		Replicate (POL=Bellona)
	Ne (diploids)	Lower bound	Upper bound	Point estimate	Lower bound	Upper bound	Point estimate
	Tikopia (POL)	50	50,000	134	119	230	575
	Kankanaey (PHP)	50	50,000	26,547	8,573	42,125	2,997
	Paiwan Taiwanese aborigines (TWN)	50	50,000	4,264	2,508	11,739	14,648
	Han Chinese (HAN)	50	50,000	35,483	17,060	53,453	43,582
	POL bottleneck	5	2,500	298	227	2,018	75
	PHP bottleneck	5	2,500	91	73	122	112
	TWN bottleneck	5	2,500	872	233	1,945	194
	NOC Ghost	50	50,000	40,166	22,159	44,484	15,754
	Ancestral NOC	50	50,000	24,309	14,931	43,627	41,709
	Ancestral HAN-TWN-PHP-POL	50	50,000	3,232	2,758	4,707	4,275
	Ancestral TWN-PHP-POL	50	50,000	9,866	5,946	12,098	7,296
	Ancestral PHP-POL	50	50,000	19,284	12,777	41,954	10,111
	Timing of event (ya)	Lower bound	Upper bound	Point estimate	Lower bound	Upper bound	Point estimate
	NOC Ghost/PNG split	17,400	Europeans/East Asians split*	36,980	29,218	40,937	38,028
	HAN/TWN-PHP-POL split	4,350	NOC Ghost/PNG split	28,170	21,892	30,304	21,293
	TWN/PHP-POL split	3,190	HAN/TWN-PHP-POL split	7,274	6,402	10,657	10,502
	PHP/POL split	435	TWN/PHP-POL split	1,536	1,416	2,435	6,953
	NOC Ghost > POL pulse	29	PHP/POL split	493	484	1,019	3,693
	Admixture rate (%)	Lower bound	Upper bound	Point estimate	Lower bound	Upper bound	Point estimate
	NOC Ghost > POL pulse	1e-05	1	34.518	31.572	36.477	32.184
	Migration	Lower 2Nm	Upper 2Nm	scaled migration rate (2Nm)	Lower bound	Upper bound	scaled migration rate (2Nm)
	Ancestral PNG > Ancestral HAN-TWN-PHP-POL Ancestral HAN-TWN-PHP-POL > Ancestral PNG	0.0001	100	1.00 0.42	0.55 0.19	1.21 0.54	0.78 0.24
	HAN > Ancestral TWN-PHP-POL Ancestral TWN-PHP-POL > HAN	0.0001	100	0.0004 0.001	0.0003 0.001	5.42 17.6	0.63 3.78
	TWN >Ancestral PHP-POL	0.0001	100	0.07	0.002	12.5	0.007
	Ancestral PHP-POL > TWN	0.0001	100	0.02	0.003	5.29	4.05
	NOC Ghost > PNG PNG > NOC Ghost	0.0001	100	4.29 127.9	3.46 68.4	5.08 155.9	4.68 55.0
	HAN > TWN	0.0001	100	0.03	0.001	2.39	0.21
	TWN > HAN	0.0001	100	48.1	0.003	49.2	0.01
	TWN > PHP	0.0001	100	0.31	0.001	7.79	4.71
	PHP > TWN	0.0001	100	0.03	0.001	5.9	0.005
	PHP > POL	0.0001	100	0.03	0.001	0.23	0.34
	POL > PHP	0.0001	100	0.002	0.001	4.71	0.002
	* indicates parameters fixed to point estimates obtained in the baseline model (Supplementary Table 2)
	NOC stands for Near Oceania(n)
	All parameters were drawn from a uniform distribution between reported search ranges, except migration and admixture rates for which the distribution was log-uniform.
	Model (TWN,(PHP,POL))
	Timing of events (ya)	Mutation rate (mut/site/generation)
		1.4x10-8	1.25x10-8
	NOC Ghost/PNG split	33,018	36,980
	HAN/TWN-PHP-POL split	25,152	28,170
	TWN/PHP-POL split	6,495	7,274
	PHP/POL split	1,371	1,536
	NOC Ghost > POL pulse	440	493

## Sheet: Table S06 PHP SLI
	Supplementary Table 6. Parameter estimates for the model of East/Southeast Asians
	Parameter	Search range		Model (TWN,(PHP,SEA GST)) with SLI	Confidence interval (95%CI)
	Ne (diploids)	Lower bound	Upper bound	Point estimate	Lower bound	Upper bound
	SEA Ghost	50	50,000	28,921	6,449	47,224
	Kankanaey (PHP)	50	50,000	3,525	1,568	21,394
	Paiwan Taiwanese aborigines (TWN)	50	50,000	6,059	4,267	10,950
	Han Chinese (HAN)	50	50,000	13,489	9,239	17,582
	Vella Lavella (SLI)	50	50,000	2,568	1,490	3,836
	SEA Ghost bottleneck	5	2,500	755	239	2,097
	PHP bottleneck	5	2,500	280	86	2,197
	TWN bottleneck	5	2,500	1,214	279	2,015
	NOC Ghost	50	50,000	39,792	9,224	43,761
	Ancestral NOC	50	50,000	3,496	2,977	38,594
	Ancestral HAN-TWN-PHP-SEA Ghost	50	50,000	5,423	2,989	35,334
	Ancestral TWN-PHP-SEA Ghost	50	50,000	1,771	1,346	2,617
	Ancestral PHP-SEA Ghost	50	50,000	37,357	10,374	43,238
	Timing of event (ya)	Lower bound	Upper bound	Point estimate	Lower bound	Upper bound
	NOC Ghost/PNG split	23,200	Europeans/East Asians split*	45,092	36,194	46,752
	HAN/TWN-PHP-SEA Ghost split	7,250	NOC Ghost/PNG split	36,697	31,381	43,893
	NOC Ghost/SLI split	5,800	HAN/TWN-PHP-SEA Ghost split	30,812	22,010	35,459
	TWN/PHP-SEA Ghost split	3,190	NOC Ghost/SLI split	11,251	8,436	13,981
	PHP/SEA Ghost split	435	TWN/PHP-SEA Ghost split	8,915	5,081	11,296
	SEA Ghost > SLI pulse	29	PHP/SEA Ghost split	2,712	1,710	7,013
	Admixture rate (%)	Lower bound	Upper bound	Point estimate	Lower bound	Upper bound
	SEA Ghost > SLI pulse	1e-05	1	37.719	34.119	41.775
	Migration	Lower 2Nm	Upper 2Nm	scaled migration rate (2Nm)	Lower bound	Upper bound
	Ancestral PNG > Ancestral HAN-TWN-PHP-SEA Ghost Ancestral HAN-TWN-PHP-SEA Ghost > Ancestral PNG	0.0001	100	3.07 1.07	0.12 0.01	34.6 2.29
	HAN > Ancestral TWN-PHP-SEA Ghost Ancestral TWN-PHP-SEA Ghost > HAN	0.0001	100	9.5 72.3	6.29 40.6	11.6 87.8
	TWN > Ancestral PHP-SEA Ghost	0.0001	100	0.66	0.001	9.64
	Ancestral PHP-SEA Ghost > TWN	0.0001	100	0.001	0.001	3.93
	NOC Ghost > PNG PNG > NOC Ghost	0.0001	100	5.18 109.2	3.65 25.2	10.4 279.2
	NOC Ghost > SLI	0.0001	100	1.94	0.18	3.56
	SLI > NOC Ghost	0.0001	100	3.69	0.001	9.71
	HAN > TWN	0.0001	100	0.07	0.003	3.22
	TWN > HAN	0.0001	100	0.08	0.001	16.7
	TWN > PHP	0.0001	100	0.01	0.0009	2.24
	PHP > TWN	0.0001	100	1.78	0.001	2.31
	PHP > SEA Ghost	0.0001	100	0.43	0.0006	15.5
	SEA Ghost > PHP	0.0001	100	0.02	0.0006	7.93
	* indicates parameters fixed to point estimates obtained in the baseline model (Supplementary Table 2)
	NOC stands for Near Oceania(n)
	All parameters were drawn from a uniform distribution between reported search ranges, except migration and admixture rates for which the distribution was log-uniform.
	Model (TWN,(PHP,SEA GST)) with SLI
	Timing of events (ya)	Mutation rate (mut/site/generation)
		1.4x10-8	1.25x10-8
	NOC Ghost/PNG split	40,261	45,092
	HAN/TWN-PHP-SEA Ghost split	32,765	36,697
	NOC Ghost/SLI split	27,510	30,812
	TWN/PHP-SEA Ghost split	10,046	11,251
	PHP/SEA Ghost split	7,959	8,915
	SEA Ghost > SLI pulse	2,421	2,712

## Sheet: Table S07 No-pulse model
	Supplementary Table 7. Parameter estimates for the refined model of East/Southeast Asians
	Parameter	Search range		Model (TWN,(PHP,POL))	Confidence interval (95%CI)
	Ne (diploids)	Lower bound	Upper bound	Point estimate	Lower bound	Upper bound
	Tikopia (POL)	50	50,000	130	113	164
	Kankanaey (PHP)	50	50,000	33,091	5,738	39,665
	Paiwan Taiwanese aborigines (TWN)	50	50,000	16,639	4,391	43,913
	Han Chinese (HAN)	50	50,000	33,053	19,332	48,062
	NEA Ghost	5	2,500	30,367	9,251	43,492
	POL bottleneck	5	2,500	858	466	2,096
	PHP bottleneck	5	2,500	87	83	146
	TWN bottleneck	5	2,500	99	91	1,167
	Ancestral POL-PHP	50	50,000	36,732	9,848	43,431
	Ancestral TWN-POL-PHP	50	50,000	4,591	2,615	6,756
	Ancestral HAN-TWN-POL-PHP	50	50,000	28,528	9,105	40,415
	Ancestral NEA Ghost-HAN-TWN-POL-PHP	50	50,000	2,818	2,670	3,661
	Timing of event (ya)	Lower bound	Upper bound	Point estimate	Lower bound	Upper bound
	NEA Ghost/HAN-TWN-POL-PHP split	5,800	NOC Ghost/PNG split*	18,444	13,936	21,022
	HAN/TWN-POL-PHP split	4,350	NEA Ghost/HAN-TWN-PHP split	17,322	11,712	18,642
	TWN/POL-PHP split	2,900	HAN/TWN-PHP split	6,071	4,168	9,359
	POL/PHP split	1,010	TWN/POL-PHP split	1,611	1,330	2,194
	Denisova > NEA Ghost-HAN-TWN-POL-PHP pulse	NEA Ghost/HAN-TWN-POL-PHP split	Europeans/East Asians split**	20,947	15,476	26,045
	HAN > TWN pulse	29	POL/PHP split	230	173	1,423
	Admixture (%)	Lower bound	Upper bound	Point estimate	Lower bound	Upper bound
	Denisova > NEA Ghost-HAN-TWN-POL-PHP pulse	1e-06	0.1	1.63	1.033	1.982
	HAN > TWN pulse	1e-05	1	14.906	0.017	15.056
	Migration (2Nm)	Lower 2Nm	Upper 2Nm	scaled migration rate (2Nm)	Lower bound	Upper bound
	Ancestral Europe > Ancestral NEA Ghost-HAN-TWN-POL-PHP Ancestral NEA Ghost-HAN-TWN-POL-PHP > Ancestral Europe	0.0001	100	0.54 0.71	0.002 0.002	0.68 0.92
	Europe > NEA Ghost NEA Ghost > Europe	0.0001	100	0.048 0.006	0.0045 0.0006	2.15 0.36
	Ancestral PNG > Ancestral NEA Ghost-HAN-TWN-POL-PHP Ancestral NEA Ghost-HAN-TWN-POL-PHP > Ancestral PNG	0.0001	100	0.79 0.38	0.77 0.34	1.19 0.58
	TWN > POL-PHP POL-PHP > TWN	0.0001	100	0.039 0.018	0.0009 0.0007	4.50 4.50
	* indicates parameters fixed to point estimates obtained in the model of East-Asians (Supplementary Table 6, 'PHP-POL')
	** indicates parameters fixed to point estimates obtained in the baseline model (Supplementary Table 2)
	Model (TWN,(PHP,POL)) 'No-pulse'
	Timing of events (ya)	Mutation rate (mut/site/generation)
		1.4x10-8	1.25x10-8 (this study)
	NEA Ghost/HAN-TWN-POL-PHP split	16,468	18,444
	HAN/TWN-POL-PHP split	15,466	17,322
	TWN/POL-PHP split	5,421	6,071
	POL/PHP split	1,438	1,611
	Denisova > NEA Ghost-HAN-TWN-POL-PHP pulse	18,703	20,947
	HAN > TWN pulse	205	230

## Sheet: Table S07 2-pulse model
	Supplementary Table 7. Parameter estimates for the refined model of East/Southeast Asians
	Parameter	Search range		Model (TWN,(PHP,POL))	Confidence interval (95%CI)
	Ne (diploids)	Lower bound	Upper bound	Point estimate	Lower bound	Upper bound
	Tikopia (POL)	50	50,000	124	107	156
	Kankanaey (PHP)	50	50,000	30,301	5,698	43,424
	Paiwan Taiwanese aborigines (TWN)	50	50,000	40,551	3,071	42,170
	Han Chinese (HAN)	50	50,000	23,761	19,459	45,317
	NEA Ghost	5	2,500	17,907	6,385	41,883
	POL bottleneck	5	2,500	838	524	1,942
	PHP bottleneck	5	2,500	94	76	129
	TWN bottleneck	5	2,500	158	119	1801
	Ancestral POL-PHP	50	50,000	10,836	6,755	42,517
	Ancestral TWN-POL-PHP	50	50,000	4,040	1,275	6,287
	Ancestral HAN-TWN-POL-PHP	50	50,000	31,015	11,813	45,762
	Ancestral NEA Ghost-HAN-TWN-POL-PHP	50	50,000	2,959	2,404	3,270
	Timing of event (ya)	Lower bound	Upper bound	Point estimate	Lower bound	Upper bound
	NEA Ghost/HAN-TWN-POL-PHP split	5,800	NOC Ghost/PNG split*	15,815	12,859	22,475
	HAN/TWN-POL-PHP split	4,350	NEA Ghost/HAN-TWN-PHP split	12,749	10,607	17,691
	TWN/POL-PHP split	2,900	HAN/TWN-PHP split	5,673	4,285	11,069
	POL/PHP split	1,010	TWN/POL-PHP split	1,547	1,255	2,152
	Denisova > NEA Ghost-HAN-TWN-POL-PHP pulse	NEA Ghost/HAN-TWN-POL-PHP split	Europeans/East Asians split**	16,531	13,995	28,631
	NEA Ghost > Ancestral TWN-POL-PHP pulse	TWN/POL-PHP split	HAN/TWN-POL-PHP split	11,718	7,480	15,201
	NEA Ghost > HAN pulse	TWN/POL-PHP split	HAN/TWN-POL-PHP split	6,847	6,168	14,673
	HAN > TWN pulse	29	POL/PHP split	172	170	1,543
	Admixture (%)	Lower bound	Upper bound	Point estimate	Lower bound	Upper bound
	NEA Ghost > Ancestral TWN-POL-PHP pulse	1e-05	1	39.952	0.008	39.952
	NEA Ghost > HAN pulse	1e-05	1	2.191	0.005	28.42
	HAN > TWN pulse	1e-05	1	0.403	0.008	11.564
	Migration (2Nm)	Lower 2Nm	Upper 2Nm	scaled migration rate (2Nm)	Lower bound	Upper bound
	Ancestral PNG > Ancestral NEA Ghost-HAN-TWN-POL-PHP Ancestral NEA Ghost-HAN-TWN-POL-PHP > Ancestral PNG	0.0001	100	0.92 0.42	0.71 0.30	1.26 0.67
	TWN > POL-PHP POL-PHP > TWN	0.0001	100	0.41 1.53	0.0009 0.001	10.5 10.8
	* indicates parameters fixed to point estimates obtained in the model of East-Asians (Supplementary Table 6, 'PHP-POL')
	** indicates parameters fixed to point estimates obtained in the baseline model (Supplementary Table 2)
	Model (TWN,(PHP,POL)) '2-pulse'
	Timing of events (ya)	Mutation rate (mut/site/generation)
		1.4x10-8	1.25x10-8 (this study)
	NEA Ghost/HAN-TWN-POL-PHP split	14,121	15,815
	HAN/TWN-POL-PHP split	11,383	12,749
	TWN/POL-PHP split	5,065	5,673
	POL/PHP split	1,381	1,547
	Denisova > NEA Ghost-HAN-TWN-POL-PHP pulse	14,760	16,531
	NEA Ghost > Ancestral TWN-POL-PHP pulse	10,463	11,718
	NEA Ghost > HAN pulse	6,113	6,847
	HAN > TWN pulse	154	172

[truncated: 35 more sheets: Table S07 3-pulse model, Table S08 Near Oceania, Table S08 Remote Oceania, Table S08 East Southeast Asia, Table S09, Table S10, Table S11, Table S12, Table S13, Table S14, Table S15, Table S16, Table S17, Table S18, Table S19, Table S20, Table S21, Table S21 Papuans, Table S21 Solomon Islanders, Table S21 Ni-Vanuatu …]
